# Supplementary material for: A Prediction Model for Deciphering Intratumoral Heterogeneity Derived from the Microglia/Macrophages of Glioma Using Non-Invasive Radiogenomics
Source: MDPI journal article supplement (doi:10.3390/brainsci13121667), 2023-12-01
Supplement: s1 [file s1]

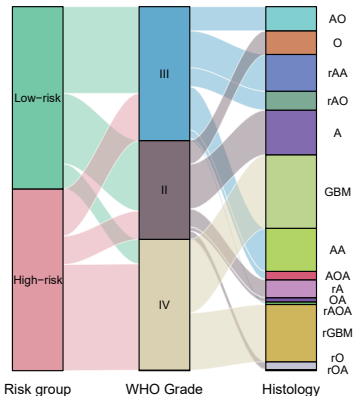

A: astrocytoma   O: oligodendroglioma   OA: oligoastrocytoma  
 AA: anaplastic astrocytoma   AO: anaplastic oligodendroglioma  
 AOA: anaplastic oligoastrocytoma   r: recurrent  
 GBM: glioblastoma
